# Supplementary material for: Polysaccharides from fermentedMomordica charantiaL. withLactobacillus plantarumNCU116 ameliorate metabolic disorders and gut microbiota change in obese rats
Source: Royal Society of Chemistry journal article supplement (doi:10.1039/d0fo02600j), 2021-01-01
Supplement: d0fo02600j1.pdf [file d0fo02600j1.pdf]

## Supplementary materials

1  
2  
3  
4  
5  
6  
7  
8  
9  
10  
11  
12  
13  
14  
15  
16  
17  
18  
19  
20  
21  
22  
23  
24  
25  
26  
27  
28  
29  
30  
31  
32  
33  
34  
35  
36

### Figure caption:

**Fig. S1** Body weight of different groups. Normal(N), normal diet feed; Model(M), high fat diet feed; N+FPM, normal diet feed plus polysaccharides from fermented *M. charantia* juice at middle dose with 100 mg/kg b.w.; N+NFP, normal diet feed plus polysaccharide from non-fermented *M. charantia* juice 100 mg/kg b.w.; FPL, high fat diet feed plus polysaccharides from fermented *M. charantia* juice at low dose with 50 mg/kg b.w.; FPM, high fat diet feed plus fermented *M. charantia* juice at middle dose with 100 mg/kg b.w.; FPH, high fat diet feed plus fermented *M. charantia* juice at high dose with 200 mg/kg b.w.; NFP, high fat diet feed plus polysaccharides from fermented *M. charantia* juice at middle dose with 100 mg/kg b.w. All values are expressed as means  $\pm$  standard deviation.

\*indicates significant difference compared with model groups,  $*p < 0.05$ ,  $**p < 0.01$ ,  $***p < 0.001$

**Fig. S2** The relative of abundance pie chart of taxonomic composition of community at phylum level

**Fig. S3** Relative abundance of main phyla in different groups. Normal(N), normal diet feed; Model(M), high fat diet feed; FPL, high fat diet feed plus polysaccharides from fermented *M. charantia* juice at low dose with 50 mg/kg b.w.; FPM, high fat diet feed plus fermented *M. charantia* juice at middle dose with 100 mg/kg b.w.; FPH, high fat diet feed plus fermented *M. charantia* juice at high dose with 200 mg/kg b.w.; NFP, high fat diet feed plus polysaccharides from fermented *M. charantia* juice at middle dose with 100 mg/kg b.w. All values are expressed as means  $\pm$  standard deviation.

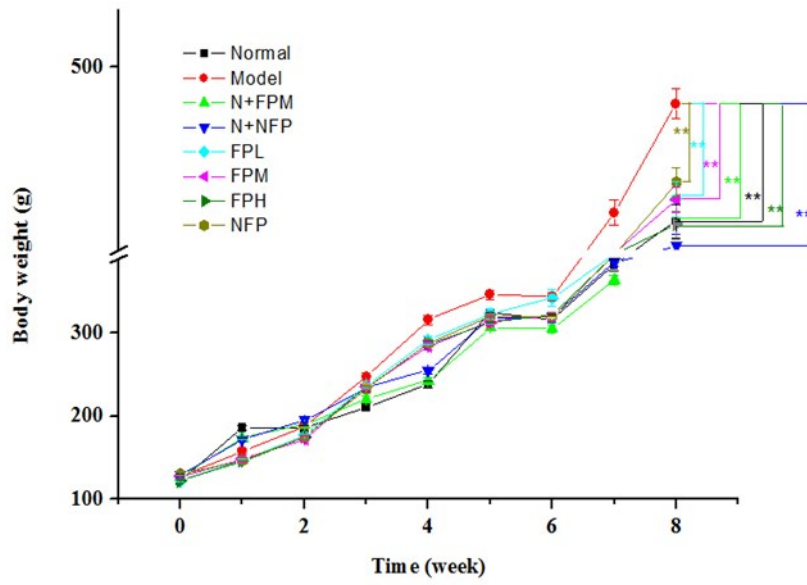

37  
38  
39  
40  
41

Fig. S1 Body weight

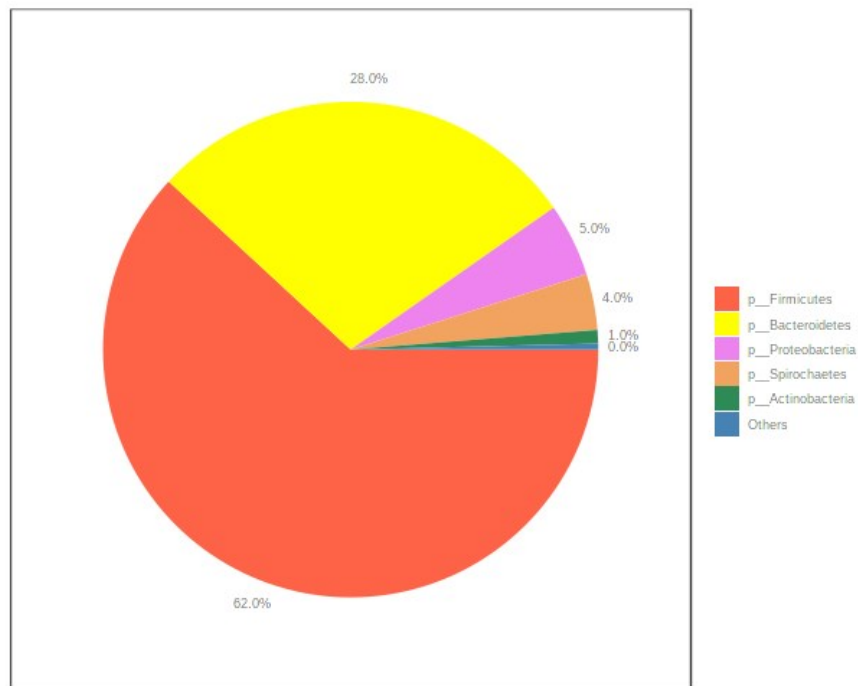

42  
43  
44

Fig. S2 The relative of abundance pie chart of taxonomic composition of community at phylum level

**Taxonomic composition of community at Phylum level using piechart**

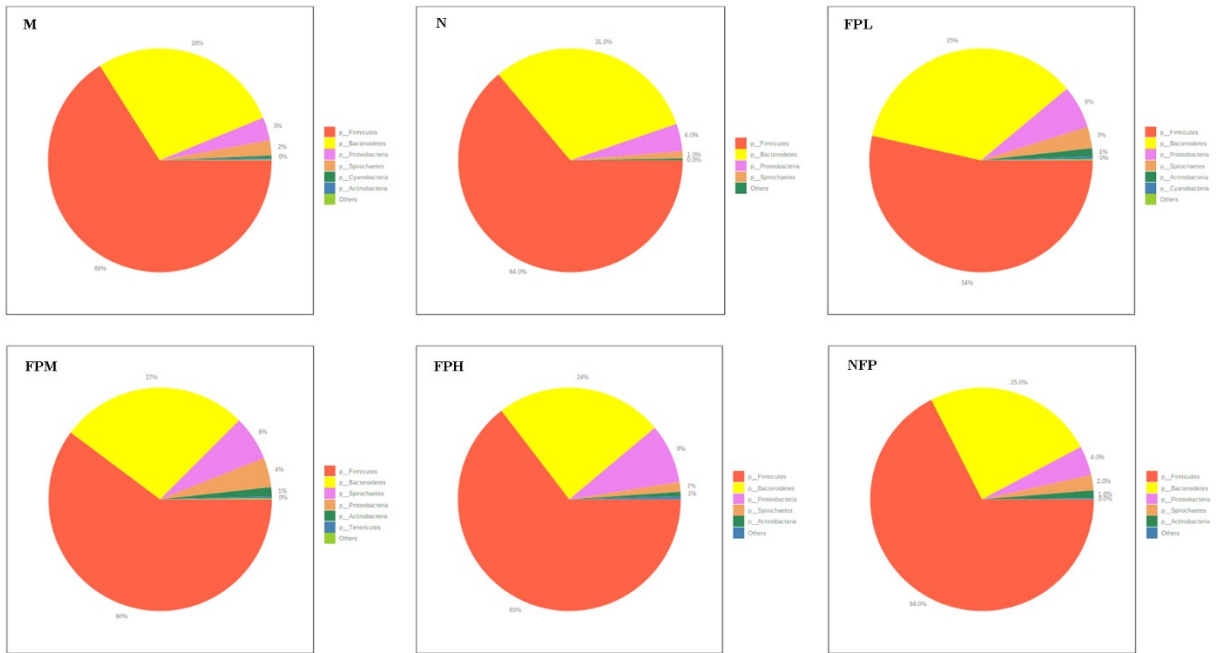

45  
46  
47  
48  
49  
50  
51  
52  
53  
54  
55  
56  
57  
58  
59  
60  
61  
62  
63  
64

**Fig. S3** Relative abundance of main phyla in different groups

**Table S1.** Levels of serum lipids in different groups <sup>a</sup>

| Groups | TC (mmol/L)    | TG (mmol/L)    | LDL-C (mmol/L) | HDL-C (mmol/L) |
|--------|----------------|----------------|----------------|----------------|
| Normal | 1.64 ± 0.20*** | 1.20 ± 0.23*** | 0.26 ± 0.03*** | 1.26 ± 0.04    |
| Model  | 2.33 ± 0.36    | 5.54 ± 1.28    | 0.47 ± 0.11    | 1.18 ± 0.06    |
| N+FPM  | 1.77 ± 0.25*** | 1.29 ± 0.26*** | 0.30 ± 0.03*** | 1.38 ± 0.06    |
| N+NFP  | 1.70 ± 0.26*** | 1.42 ± 0.31*** | 0.32 ± 0.05*** | 1.37 ± 0.06    |
| FPL    | 1.96 ± 0.14    | 2.98 ± 0.81*** | 0.43 ± 0.06    | 1.33 ± 0.05    |
| FPM    | 1.99 ± 0.39    | 4.39 ± 1.21    | 0.43 ± 0.09    | 1.32 ± 0.06    |
| FPH    | 2.14 ± 0.32    | 3.80 ± 1.37*** | 0.49 ± 0.09    | 1.37 ± 0.07    |
| NFP    | 2.31 ± 0.26    | 4.50 ± 0.52    | 0.48 ± 0.64    | 1.48 ± 0.04**  |

66 a. TC, total cholesterol; TG, triglyceride; HDL-C, high density lipoprotein cholesterol; LDL-C,  
67 low density lipoprotein cholesterol. All values are expressed as means ± standard deviation.  
68 Significant difference existed compared with Model group, \*,  $p < 0.05$ ; \*\*,  $p < 0.01$ , \*\*\*,  $p < 0.001$

69

70

71

72

73

74

75

76

77

78

79

80

81

82

83

84

85

86

87

88

89

90

**Table S2.** 103 identified metabolites from the METLIN MS and MS/MS database

| Common name                                   | Class                                    | Adducts       | Retention time (min) | m/z      | Formula    | HMDB        |
|-----------------------------------------------|------------------------------------------|---------------|----------------------|----------|------------|-------------|
| LysoPC(18:3(9Z,12Z,15Z))                      | Glycerophosphocholines                   | M+H           | 15.56528             | 518.3232 | C26H48NO7P | HMDB0010388 |
| Deoxycytidine                                 | Pyrimidine nucleosides                   | M-H           | 2.524767             | 226.0827 | C9H13N3O4  | HMDB0000014 |
| Taurocholic acid                              | bile acid                                | M+H,<br>M+NH4 | 5.645917             | 533.3251 | C26H45NO7S | HMDB0000036 |
| L-Carnitine                                   | Carnitines(Organonitrogen compounds)     | M+H           | 2.85935              | 162.1125 | C7H15NO3   | HMDB0000062 |
| Cytidine                                      | Pyrimidine nucleosides                   | M+H           | 10.48608             | 244.0924 | C9H13N3O5  | HMDB0000089 |
| L-Glutamic acid                               | glutamic acid and derivatives            | M-H           | 15.77977             | 146.0453 | C5H9NO4    | HMDB0000148 |
| L-Tyrosine                                    | Tyrosine and derivatives                 | M-H           | 18.71543             | 180.0664 | C9H11NO3   | HMDB0000158 |
| Isocitric acid                                | tricarboxylic acids and derivatives      | M-H           | 3.9484               | 191.0191 | C6H8O7     | HMDB0000193 |
| Indoleacetic acid                             | Indolyl carboxylic acids and derivatives | M+H           | 4.21035              | 176.0707 | C10H9NO2   | HMDB0000197 |
| L-Acetylcarnitine                             | Fatty acid esters (Fatty Acyls)          | M+H           | 16.76088             | 204.1227 | C9H17NO4   | HMDB0000201 |
| Sphinganine                                   | Amines                                   | M+H           | 14.27587             | 302.3052 | C18H39NO2  | HMDB0000269 |
| Uric acid                                     | Purines and purine derivatives           | M+H           | 23.8108              | 169.0358 | C5H4N4O3   | HMDB0000289 |
| 1,3,12-Trihydroxycholan-24-oic acid           | Steroids and steroid derivatives         | M+H           | 23.22067             | 409.2949 | C24H40O5   | HMDB0000371 |
| 7alpha-Hydroxy-3-oxo-5beta-cholan-24-oic acid | Bile acids, alcohols and derivatives     | M+H           | 13.43408             | 391.2838 | C24H38O4   | HMDB0000503 |
| L-Arginine                                    | Amino acids, peptides, and analogues     | M+H           | 17.85015             | 175.1185 | C6H14N4O2  | HMDB0000517 |
| Cholic acid                                   | bile acid                                | M-H           | 23.68432             | 407.2783 | C24H40O5   | HMDB0000619 |
| Deoxycholic acid                              | Bile acids, alcohols and derivatives     | M-H           | 6.369183             | 391.2861 | C24H40O4   | HMDB0000626 |
| Deoxycholic acid glycine conjugate            | Bile acids, alcohols and derivatives     | M+H           | 10.59358             | 450.3231 | C26H43NO5  | HMDB0000631 |
| D-Fructose                                    | monosaccharides                          | M-H           | 14.887               | 179.057  | C6H12O6    | HMDB0000660 |
| Linoleic acid                                 | doubly unsaturated fatty acid            | M-H           | 12.34873             | 279.2322 | C18H32O2   | HMDB0000673 |
| L-Methionine                                  | methionine and derivatives               | M-H           | 12.84188             | 148.0443 | C5H11NO2S  | HMDB0000696 |

|                                    |                                              |               |          |          |            |             |
|------------------------------------|----------------------------------------------|---------------|----------|----------|------------|-------------|
| Hippuric acid                      | Benzoic acids and derivatives                | M+H           | 11.81648 | 180.0653 | C9H9NO3    | HMDB0000714 |
| Indoleacrylic acid                 | Indoles and derivatives                      | M+H,<br>M+NH4 | 10.39642 | 205.0967 | C11H9NO2   | HMDB0000734 |
| Stearic acid                       | Long-chain fatty acids                       | M-H           | 15.25347 | 283.2632 | C18H36O2   | HMDB0000827 |
| Ribothymidine                      | Pyrimidine nucleosides                       | M+H,<br>M+NH4 | 3.5467   | 276.1199 | C10H14N2O6 | HMDB0000884 |
| Sphinganine 1-phosphate            | Sphingolipids                                | M+H           | 5.741217 | 382.2723 | C18H40NO5P | HMDB0001383 |
| Alpha-Linolenic acid               | polyunsaturated fatty acid                   | M-H           | 5.893017 | 277.2164 | C18H30O2   | HMDB0001388 |
| Myristoleic acid                   | Long-chain fatty acids                       | M-H           | 3.97095  | 225.185  | C14H26O2   | HMDB0002000 |
| N-Oleoylethanolamine               | Amines                                       | M+H           | 11.45993 | 326.3051 | C20H39NO2  | HMDB0002088 |
| Docosahexaenoic acid               | Very long-chain fatty acids                  | M+H           | 16.3649  | 329.2476 | C22H32O2   | HMDB0002183 |
| Dodecanoylcarnitine                | Fatty acid esters                            | M+H           | 16.23725 | 344.28   | C19H37NO4  | HMDB0002250 |
| Indole-3-propionic acid            | Indolyl carboxylic acids and derivatives     | M+H           | 17.45735 | 190.086  | C11H11NO2  | HMDB0002302 |
| Docosatrienoic acid                | very long-chain fatty acids                  | M-H           | 11.08843 | 333.2791 | C22H38O2   | HMDB0002823 |
| 8,11,14-Eicosatrienoic acid        | Long-chain fatty acids                       | M-H           | 16.2774  | 305.25   | C20H34O2   | HMDB0002925 |
| Palmitoleic acid                   | unsaturated fatty acid                       | M-H           | 15.63445 | 253.2175 | C16H30O2   | HMDB0003229 |
| Vaccenic acid                      | Long-chain fatty acids                       | M-H           | 4.398167 | 281.2476 | C18H34O2   | HMDB0003231 |
| N1-Methyl-4-pyridone-3-carboxamide | Pyridines and derivatives                    | M+H           | 10.85938 | 153.0657 | C7H8N2O2   | HMDB0004194 |
| 8-HETE                             | Eicosanoids                                  | M-H           | 4.337317 | 319.2276 | C20H32O3   | HMDB0004679 |
| 16(R)-HETE                         | Eicosanoids                                  | M-H           | 9.06725  | 319.2294 | C20H32O3   | HMDB0004680 |
| Tetradecanoylcarnitine             | Fatty acid esters (Fatty Acyls)              | M+H           | 28.1543  | 372.3126 | C21H41NO4  | HMDB0005066 |
| 18-Hydroxyarachidonic acid         | Eicosanoids(Fatty Acyls)                     | M+H           | 27.86037 | 321.2432 | C20H32O3   | HMDB0006245 |
| Linoelaidic acid                   | Lineolic acids and derivatives (Fatty Acyls) | M+H           | 28.22682 | 281.2479 | C18H32O2   | HMDB0006270 |
| Docosapentaenoic acid (22n-3)      | Very long-chain fatty acids ( Fatty Acyls)   | M-H           | 28.09873 | 329.2497 | C22H34O2   | HMDB0006528 |
| 9(S)-HPODE                         | Lineolic acids and derivatives               | M-H           | 16.77855 | 311.222  | C18H32O4   | HMDB0006940 |
| LysoPA(18:2(9Z,12Z)/0:0)           | Glycerophospholipids                         | M+H           | 8.951833 | 435.2515 | C21H39O7P  | HMDB0007856 |

|                                         |                                                 |               |          |          |            |             |
|-----------------------------------------|-------------------------------------------------|---------------|----------|----------|------------|-------------|
| PC(18:2(9Z,12Z)/20:2(11Z,14Z))          | phosphatidylcholine                             | M+H           | 5.746683 | 810.5994 | C46H84NO8P | HMDB0008145 |
| PC(20:5(5Z,8Z,11Z,14Z,17Z)/20:0)        | phosphatidylcholine                             | M+H           | 8.8975   | 542.325  | C28H48NO7P | HMDB0008504 |
| LysoPC(14:0/0:0)                        | Glycerophosphocholines                          | M+H           | 4.673567 | 468.3106 | C22H46NO7P | HMDB0010379 |
| LysoPC(16:1(9Z)/0:0)                    | Glycerophosphocholines                          | M+H           | 29.00177 | 494.3247 | C24H48NO7P | HMDB0010383 |
| LysoPC(18:2(9Z,12Z))                    | Glycerophosphocholines                          | M+H           | 7.552967 | 520.338  | C26H50NO7P | HMDB0010386 |
| LysoPC(20:2(11Z,14Z))                   | Glycerophosphocholines                          | M+H           | 8.978583 | 548.3704 | C28H54NO7P | HMDB0010392 |
| LysoPC(20:3(5Z,8Z,11Z))                 | Glycerophosphocholines                          | M+H           | 4.165417 | 546.3551 | C28H52NO7P | HMDB0010393 |
| LysoPC(20:3(8Z,11Z,14Z))                | Glycerophosphocholines                          | M+H           | 3.513283 | 546.3581 | C28H52NO7P | HMDB0010394 |
| LysoPC(20:4(5Z,8Z,11Z,14Z))             | Glycerophosphocholines                          | M+H           | 2.1107   | 544.3379 | C28H50NO7P | HMDB0010395 |
| LysoPC(22:4(7Z,10Z,13Z,16Z))            | Glycerophosphocholines                          | M+H           | 14.5365  | 572.3709 | C30H54NO7P | HMDB0010401 |
| LysoPC(22:5(4Z,7Z,10Z,13Z,16Z))         | Glycerophosphocholines                          | M+H           | 4.5242   | 570.3557 | C30H52NO7P | HMDB0010402 |
| LysoPC(22:6(4Z,7Z,10Z,13Z,16Z,19Z))     | Glycerophosphocholines                          | M+H           | 1.413717 | 568.34   | C30H50NO7P | HMDB0010404 |
| LysoPE(18:0/0:0)                        | Glycerophospholipids                            | M+H           | 9.65925  | 482.3237 | C23H48NO7P | HMDB0011130 |
| MG(18:0/0:0/0:0)                        | Monoacylglyceride                               | M+H,<br>M+NH4 | 7.159917 | 359.3165 | C21H42O4   | HMDB0011131 |
| LysoPE(16:0/0:0)                        | Glycerophospholipids                            | M+H           | 3.856667 | 454.2932 | C21H44NO7P | HMDB0011503 |
| LysoPE(18:1(9Z)/0:0)                    | Glycerophospholipids                            | M+H           | 5.662183 | 480.3085 | C23H46NO7P | HMDB0011506 |
| LysoPE(18:2(9Z,12Z)/0:0)                | Glycerophosphoethanolamines                     | M+H           | 9.8425   | 478.295  | C23H44NO7P | HMDB0011507 |
| LysoPE(20:4(8Z,11Z,14Z,17Z)/0:0)        | Glycerophosphoethanolamines                     | M+H           | 9.49795  | 502.2938 | C25H44NO7P | HMDB0011518 |
| LysoPE(22:6(4Z,7Z,10Z,13Z,16Z,19Z)/0:0) | Glycerophosphoethanolamines                     | M+H           | 9.360267 | 526.2942 | C27H44NO7P | HMDB0011526 |
| MG(0:0/14:0/0:0)                        | Monoradylglycerols                              | M+H           | 1.157017 | 303.2536 | C17H34O4   | HMDB0011530 |
| MG(0:0/18:1(9Z)/0:0)                    | Monoradylglycerols                              | M+H           | 3.909667 | 357.2999 | C21H40O4   | HMDB0011537 |
| MG(0:0/18:2(9Z,12Z)/0:0)                | Lineolic acids and derivatives<br>(Fatty Acyls) | M+H           | 9.382217 | 355.2843 | C21H38O4   | HMDB0011538 |
| p-Cresol sulfate                        | Arylsulfates                                    | M-H           | 9.442767 | 187.007  | C7H8O4S    | HMDB0011635 |
| LysoPC(17:0)                            | Glycerophosphocholines                          | M+H           | 6.9187   | 510.3544 | C25H52NO7P | HMDB0012108 |
| Palmitic amide                          | Fatty amides                                    | M+H           | 14.42163 | 254.2479 | C16H31NO   | HMDB0012273 |
| 12S-HHTrE                               | Long-chain fatty acids                          | M-H           | 24.58277 | 279.1976 | C17H28O3   | HMDB0012535 |

|                                            |                                             |     |          |          |            |             |
|--------------------------------------------|---------------------------------------------|-----|----------|----------|------------|-------------|
| Vitamin A2                                 | Retinoids                                   | M+H | 15.8441  | 285.2214 | C20H28O    | HMDB0013117 |
| D-Tryptophan                               | indolyl carboxylic acids and derivatives    | M-H | 14.63442 | 203.0818 | C11H12N2O2 | HMDB0013609 |
| Dihomo-gamma-Linolenoyl ethanolamide       | Amines                                      | M+H | 12.11248 | 350.3058 | C22H39NO2  | HMDB0013625 |
| Tranexamic Acid                            | Amino acids(Organic acids and derivatives ) | M+H | 17.21618 | 158.1174 | C8H15NO2   | HMDB0014447 |
| Rimexolone                                 | 20-oxosteroids                              | M+H | 14.662   | 371.259  | C24H34O3   | HMDB0015033 |
| Ethyl hexadecanoate                        | Fatty acid esters                           | M-H | 20.74298 | 283.2638 | C18H36O2   | HMDB0029811 |
| 6-Acetyl-2,2-dimethyl-2H-1-benzopyran      | 1-benzopyrans                               | M+H | 22.57672 | 203.1069 | C13H14O2   | HMDB0030816 |
| Isopalmitic acid                           | Long-chain fatty acids                      | M-H | 21.56802 | 255.2323 | C16H32O2   | HMDB0031068 |
| Annosquamosin B                            | Diterpenoids                                | M+H | 15.86243 | 309.2424 | C19H32O3   | HMDB0031379 |
| D-Malic acid                               | Beta hydroxy acids and derivatives          | M-H | 15.21897 | 133.0141 | C4H6O5     | HMDB0031518 |
| 3-Methyl-1-phenyl-3-pentanol               | Benzene and substituted derivatives         | M+H | 11.83932 | 179.143  | C12H18O    | HMDB0031731 |
| 2,4,12-Octadecatrienoic acid isobutylamide | Fatty amides                                | M+H | 14.41082 | 334.312  | C22H39NO   | HMDB0032033 |
| Ethyl tetradecanoate                       | Fatty acid esters                           | M-H | 5.240083 | 255.2319 | C16H32O2   | HMDB0034153 |
| (S)-4-(4-Methylphenyl)-2-pentanone         | Monoterpenoids                              | M+H | 5.662183 | 177.1272 | C12H16O    | HMDB0034177 |
| Lucidone C                                 | Oxosteroids                                 | M+H | 5.86525  | 405.2632 | C24H36O5   | HMDB0038152 |
| Ethyl icosapentate                         | Fatty acid esters ( Fatty Acyls)            | M+H | 14.691   | 331.2636 | C22H34O2   | HMDB0039530 |
| Valdiate                                   | Monoterpenoids                              | M+H | 27.41028 | 311.1849 | C17H26O5   | HMDB0040980 |
| 1-Heptadecanoylglycerophosphoethanolamine  | Glycerophosphoethanolamines                 | M+H | 15.61178 | 468.3078 | C22H46NO7P | HMDB0061691 |
| 1-Linoleoylglycerophosphocholine           | Glycerophosphocholines                      | M+H | 16.63583 | 520.3416 | C26H50NO7P | HMDB0061692 |
| 1-Oleoylglycerophosphoserine               | Glycerophosphoserines                       | M+H | 16.18325 | 524.2987 | C24H46NO9P | HMDB0061694 |
| 2-Palmitoylglycerophosphocholine           | Glycerophosphocholines                      | M+H | 16.06725 | 496.3385 | C24H50NO7P | HMDB0061702 |
| Dehydroabietic acid                        | Diterpenoids                                | M+H | 12.05798 | 301.2159 | C20H28O2   | HMDB0061925 |



|                                                     |                                      |            |          |          |            |             |
|-----------------------------------------------------|--------------------------------------|------------|----------|----------|------------|-------------|
| 2-acetyl-1-alkyl-sn-glycero-3-phosphocholine        | Glycerophosphocholines               | M+H        | 14.27587 | 524.3702 | C26H54NO7P | HMDB0062195 |
| (2E)-Decenoyl-ACP                                   | Amino acids, peptides, and analogues | M+H, M+NH4 | 15.52912 | 147.1126 | C6H11NO2   | HMDB0062225 |
| LPA(20:4(5Z,8Z,11Z,14Z)/0:0)                        | Glycerophospholipids                 | M+H        | 9.870367 | 459.2516 | C23H39O7P  | HMDB0062312 |
| 8Z,11Z-eicosadienoic acid                           | long-chain fatty acids               | M-H        | 6.9239   | 307.2634 | C20H36O2   | HMDB0062432 |
| 2-oleoyl-sn-glycero-3-phosphocholine                | Glycerophosphocholines               | M+H        | 16.29475 | 522.3566 | C26H52NO7P | HMDB0062651 |
| Ethyl Arachidonate                                  | Fatty acid esters                    | M+H        | 7.951067 | 333.2793 | C22H36O2   | HMDB0062725 |
| FAHFA(18:1(9Z)/12-O-18:0)                           | Long-chain fatty acids               | M-H        | 9.355133 | 563.5059 | C36H68O4   | HMDB0112105 |
| PS(20:4(5Z,8Z,11Z,14Z)/0:0)                         | Glycerophosphoserines                | M+H        | 18.69285 | 546.2837 | C26H44NO9P | HMDB0112640 |
| PS(20:5(5Z,8Z,11Z,14Z,17Z)/20:5(5Z,8Z,11Z,14Z,17Z)) | Glycerophosphoserines                | M+H        | 14.62643 | 544.2677 | C26H42NO9P | HMDB0112697 |

---

**Table S3.** the related pathway based 42 metabolites improved by *Momordica charantia* polysaccharide treatment in obesity rats

| Name                                    | Hits                | Raw p    | FDR | Impact  |
|-----------------------------------------|---------------------|----------|-----|---------|
| Glycerophospholipid metabolism          | Phosphatidylcholine | 0.04411  | 1   | 0.18333 |
|                                         | LysoPC(18:1(9Z))    |          |     |         |
| Linoleic acid metabolism                | Phosphatidylcholine | 0.055852 | 1   | 0       |
| Arachidonic acid metabolism             | 16(R)-HETE          | 0.061396 | 1   | 0       |
|                                         | Phosphatidylcholine |          |     |         |
| alpha-Linolenic acid metabolism         | Phosphatidylcholine | 0.098413 | 1   | 0       |
| Glyoxylate and dicarboxylate metabolism | Isocitric acid      | 0.1686   | 1   | 0       |
|                                         | L-Arginine          | 0.17579  | 1   | 0       |
| Aminoacyl-tRNA biosynthesis             | L-Methionine        |          |     |         |
|                                         |                     |          |     |         |
| Citrate cycle (TCA cycle)               | Isocitric acid      | 0.20637  | 1   | 0.04132 |
| Sphingolipid metabolism                 | Sphinganine         | 0.21556  | 1   | 0.14286 |
| Cysteine and methionine metabolism      | L-Methionine        | 0.27714  | 1   | 0.09464 |
| Tryptophan metabolism                   | Indoleacetic acid   | 0.37965  | 1   | 0       |
| Pyrimidine metabolism                   | Cytidine            | 0.37965  | 1   | 0.00709 |
| Biosynthesis of unsaturated fatty acids | Stearic acid        | 0.38695  | 1   | 0       |
| Fatty acid biosynthesis                 | Stearic acid        | 0.39416  | 1   | 0       |
| Arginine and proline metabolism         | L-Arginine          | 0.40129  | 1   | 0.08228 |

96

97

**Table S4.** The relative abundance of main phyla in different groups

| <b>Taxa(phylum)</b> | <b>M(%)</b> | <b>N(%)</b> | <b>FPL(%)</b> | <b>FPM(%)</b> | <b>FPH(%)</b> | <b>NFP(%)</b> |
|---------------------|-------------|-------------|---------------|---------------|---------------|---------------|
| p__Firmicutes       | 66.01       | 63.93       | 53.54         | 60.22         | 64.59         | 67.52         |
| p__Bacteroidetes    | 27.77       | 30.8        | 35.42         | 27.28         | 24.33         | 24.70         |
| p__Proteobacteria   | 3.33        | 3.97        | 6.19          | 4.29          | 8.59          | 4.27          |
| p__Spirochaetes     | 2.21        | 1.03        | 3.10          | 6.46          | 1.40          | 2.22          |
| Others              | 0.67        | 0.28        | 1.75          | 1.75          | 1.08          | 1.28          |

98
